# Supplementary material
Source: Royal Society of Chemistry journal article supplement (doi:10.1039/d6qi00828c)
Supplement: d6qi00828c1.pdf [file d6qi00828c1.pdf]

Supporting Information  
for

## Lithium Recognition Reconfigures a Multistep Spin-Crossover Pathway in a Crown Ether-Functionalized Hofmann Framework

Hong-Tai Chen, Yu-Xiao Chen, Meng Yu\* and Jun Tao\*

*Key Laboratory of Cluster Science of Ministry of Education, School of Chemistry and Chemical Engineering, Liangxiang Campus, Beijing Institute of Technology, Beijing 102488, Peoples' Republic of China.*

Email: mengyu@bit.edu.cn; Email: taojun@bit.edu.cn

### Contents

|                                                                                                                                                                               |   |
|-------------------------------------------------------------------------------------------------------------------------------------------------------------------------------|---|
| <b>Experimental Details</b> .....                                                                                                                                             | 3 |
| <b>Materials and methods</b> .....                                                                                                                                            | 3 |
| <b>Adsorption experiments details</b> .....                                                                                                                                   | 3 |
| <b>DFT calculation</b> .....                                                                                                                                                  | 3 |
| <b>Synthesis of crown ether functionalized 11,14-Bis(4-pyridyl)benzo-12-crown-4 (DPy-B12C4)</b> .....                                                                         | 4 |
| <b>Single-crystal X-Ray crystallography</b> .....                                                                                                                             | 5 |
| <b>Synthesis of [Fe(DPy-B12C4)(Ag(CN)<sub>2</sub>)<sub>2</sub>]·2(CH<sub>2</sub>Cl<sub>2</sub>) (1·2CH<sub>2</sub>Cl<sub>2</sub>)</b> .....                                   | 6 |
| <b>Additional Tables</b> .....                                                                                                                                                | 7 |
| <b>Table S1</b> . Crystallographic data and refinement details for <b>1·2CH<sub>2</sub>Cl<sub>2</sub></b> .....                                                               | 7 |
| <b>Table S2</b> . Selected bond lengths and angles for compound <b>1·2CH<sub>2</sub>Cl<sub>2</sub></b> at various temperatures .....                                          | 7 |
| <b>Table S3</b> . Structural parameters for <b>1·CH<sub>2</sub>Cl<sub>2</sub></b> at various temperatures .....                                                               | 8 |
| <b>Table S4</b> . The interaction between CH <sub>2</sub> Cl <sub>2</sub> molecules and host framework of <b>1·CH<sub>2</sub>Cl<sub>2</sub></b> at various temperatures ..... | 8 |

|                                                                                                                                                                                                                                 |    |
|---------------------------------------------------------------------------------------------------------------------------------------------------------------------------------------------------------------------------------|----|
| <b>Table S5.</b> The capture performance of <b>1·CH<sub>2</sub>Cl<sub>2</sub></b> toward different metal ions determined by ICP analysis. ....                                                                                  | 8  |
| <b>Table S6.</b> Cartesian coordinates of the optimized structure of <b>1</b> . ....                                                                                                                                            | 8  |
| <b>Table S7.</b> Cartesian coordinates of the optimized structure of <b>1+Li<sup>+</sup></b> . ....                                                                                                                             | 10 |
| <b>Table S8.</b> Cartesian coordinates of the optimized structure of <b>1+Mg<sup>2+</sup></b> . ....                                                                                                                            | 11 |
| <b>Table S9.</b> Cartesian coordinates of the optimized structure of <b>1+Na<sup>+</sup></b> . ....                                                                                                                             | 13 |
| <b>Additional Figures</b> .....                                                                                                                                                                                                 | 15 |
| <b>Fig. S1</b> The FT-IR spectra of <b>1·CH<sub>2</sub>Cl<sub>2</sub></b> . ....                                                                                                                                                | 15 |
| <b>Fig. S2</b> Powder X-ray diffraction data of <b>1·CH<sub>2</sub>Cl<sub>2</sub></b> and desolvated <b>1</b> . ....                                                                                                            | 15 |
| <b>Fig. S3</b> TG curve for <b>1·CH<sub>2</sub>Cl<sub>2</sub></b> and desolvated <b>1</b> . ....                                                                                                                                | 16 |
| <b>Fig. S4</b> (a) The asymmetric unit of <b>1·CH<sub>2</sub>Cl<sub>2</sub></b> (symmetric code: A: -x, y, 1+z; B: -1x, y, z; C: x, 1+y, z); (b) the argentophilic interactions in <b>1·CH<sub>2</sub>Cl<sub>2</sub></b> . .... | 16 |
| <b>Fig. S5</b> Powder X-ray diffraction data of <b>1·CH<sub>2</sub>Cl<sub>2</sub></b> before (black) and after (red) Li <sup>+</sup> adsorption. ....                                                                           | 17 |
| <b>Fig. S6</b> Adsorption kinetics curve of <b>1·2CH<sub>2</sub>Cl<sub>2</sub></b> for Li <sup>+</sup> ion (condition: C <sub>0</sub> = 0.5M; T = 300 K; Solvent = DCM/MeOH (1:1)). ....                                        | 17 |
| <b>Fig. S7</b> Magnetic susceptibility curves of <b>1·2CH<sub>2</sub>Cl<sub>2</sub></b> after immersion in Na <sup>+</sup> (a) and Mg <sup>2+</sup> (b) solutions. ....                                                         | 18 |
| <b>Fig. S8</b> The first-order derivative of $\chi^{MT}$ product for <b>1+Li<sup>+</sup></b> . ....                                                                                                                             | 19 |
| <b>Fig. S9</b> PXRD patterns of <b>1</b> upon Li <sup>+</sup> adsorption and desorption. ....                                                                                                                                   | 19 |
| <b>Fig. S10.</b> FTIR spectra of free DPy-B12C4 ligand before and after Li <sup>+</sup> adsorption. ....                                                                                                                        | 20 |
| <b>References</b> .....                                                                                                                                                                                                         | 22 |

## Experimental Details

### Materials and methods

All reagents and solvents, unless otherwise noted, are commercially available without further purification.

Elemental analyses (C, H, N) were measured by an EUROVECTER EA3000 analyzer. PXRD measurements were recorded using a Bruker D8 Advance Diffractometer with Cu  $K\alpha$  radiation ( $\lambda = 1.54056 \text{ \AA}$ ) between  $5$  and  $50^\circ$  ( $2\theta$ ). The simulated patterns were calculated from the single crystal data. IR spectra were recorded in the range of  $400\text{--}4000 \text{ cm}^{-1}$  on a Thermo IS5 spectrophotometer with KBr pellets. TG measurements were performed on freshly crystals using the TGDTA 6200 instrument in nitrogen atmosphere over a temperature range of  $25\text{--}800 \text{ }^\circ\text{C}$  with a heating rate of  $10 \text{ }^\circ\text{C}/\text{min}$ . DSC analyses were conducted on PerkinElmer DSC 8000 in a closed aluminum pan. The chemical states of elements were obtained by X-ray photoelectron spectroscopy (XPS, Axis Supra), during which Al  $K\alpha$  as chosen as the excitation source.

### Adsorption experiments details.

Typical adsorption experiments were conducted by placing the MOF sample (10 mg) into a 10 mL glass vial, followed by the addition of 5 mL of a 0.5 M LiCl solution in methanol/dichloromethane (1:1, v/v). The vial was then agitated on a shaker at room temperature for a predetermined period. After adsorption, the solid sample was collected by centrifugation or filtration and thoroughly washed with fresh methanol/dichloromethane (1:1) to remove residual ions from the surface. The collected solid was subsequently digested with an appropriate amount of concentrated  $\text{HNO}_3$  and diluted to a known volume with deionized water. The concentration of  $\text{Li}^+$  in the resulting solution was determined by inductively coupled plasma optical emission spectrometry (ICP-OES). Adsorption experiments for  $\text{Na}^+$  and  $\text{Mg}^{2+}$  were performed following an analogous procedure, using 0.1 M solutions of NaCl and  $\text{MgCl}_2$ , respectively, in methanol/dichloromethane (1:1). To enhance the solubility of these two salts, a minimal amount of deionized water was added to the solutions.

### DFT calculation

All density functional theory (DFT) calculations were performed using the Gaussian 16

software package at the RB3LYP/6-311+G.<sup>1</sup> To simulate the experimental solvent environment (methanol/dichloromethane, 1:1 v/v mixed solvent), the SMD implicit solvation model was adopted. Since standard implicit solvation models do not support mixed solvents, custom solvent parameters were applied with a dielectric constant of  $\epsilon = 18.5$  to approximate the 1:1 methanol/dichloromethane mixture. All species (including host, guest, and complex) were fully optimized under the same solvation model, and frequency analyses were performed to confirm that all optimized structures correspond to true minima on the potential energy surface (no imaginary frequencies).

To more accurately reflect the speciation of ions in the mixed solvent, a mixed coordination model incorporating both chloride ions and methanol molecules was employed for the metal ions. Based on the coordination preferences of ions in the mixed solvent, the following initial guest structures were constructed:

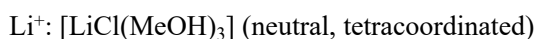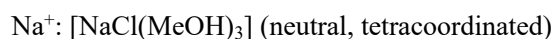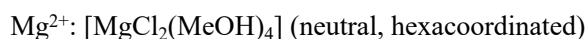

Binding energies  $\Delta E_{bind}$  were calculated according to the following equation:

$$\Delta E_{bind} = E_{complex} + m \times E_{MeOH} + n \times E_{Cl^-} - [E_{host} + E_{guest}] \quad (1)$$

where  $m$  represents the number of methanol molecules released from the first coordination shell of the metal ion during the binding process ( $\text{Li}^+$ :  $m = 3$ ,  $\text{Na}^+$ :  $m = 3$ ,  $\text{Mg}^{2+}$ :  $m = 4$ , and  $n$  denotes the number of chloride ions ( $\text{Li}^+$ :  $n = 1$ ,  $\text{Na}^+$ :  $n = 1$ ,  $\text{Mg}^{2+}$ :  $n = 2$ ). All energy values were obtained as electronic energies (single-point calculations) at the same theoretical level, and basis set superposition error (BSSE) was corrected using the counterpoise method.

#### **Synthesis of crown ether functionalized 11,14-Bis(4-pyridyl)benzo-12-crown-4 (DPy-B12C4).**

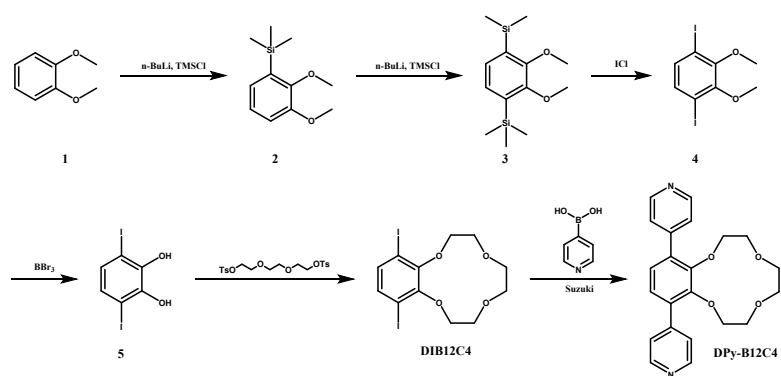

**DIB12C4** was synthesized according to the reported procedure.<sup>2</sup> The obtained <sup>1</sup>H NMR spectra matched well with those reported previously. <sup>1</sup>H NMR (500 MHz, CDCl<sub>3</sub>): δ (ppm) = 7.27 (s, 2H), 4.21 (t, J = 4.1, 4H), 3.93 (t, J = 4.1, 4H), 3.82 (s, 4H).

Crown ether functionalized 11,14-Bis(4-pyridyl)benzo-12-crown-4 (**DPy-B12C4**) was obtained through the Suzuki coupling reaction between **DIB12C4** and pyridin-4-ylboronic acid. The experimental procedures are as follows:

**DIB12C4** (0.5 mmol, 238 mg), K<sub>2</sub>CO<sub>3</sub> (345 mg, 5.0 equiv.), pyridin-4-ylboronic acid (154 mg, 2.5 equiv.), and Pd(PPh<sub>3</sub>)<sub>4</sub> (60 mg, 0.1 equiv.) were added into a two-necked flask. A degassed mixture of 1,4-dioxane (12 mL) and H<sub>2</sub>O (3 mL) was added into the flask under N<sub>2</sub> atmosphere. The reaction mixture was heated to reflux at 100 °C for 24 h. After cooling to room temperature, the solvent was evaporated under reduced pressure and the residue was diluted with H<sub>2</sub>O (20 mL), extracted with CH<sub>2</sub>Cl<sub>2</sub> (3 × 50 mL). The combined organic layer was washed with brine, dried over Na<sub>2</sub>SO<sub>4</sub>, and then evaporated to dryness. The crude product was purified by flash column chromatography on silica gel with DCM/MeOH (20:1) as the eluent to give the product **DPy-B12C4**. Yield: 158 mg (83.5%). <sup>1</sup>H NMR (500 MHz, CDCl<sub>3</sub>): δ (ppm) = 8.61 (s, 4H), 7.50 (s, 4H), 7.17 (s, 2H), 3.87 (s, 4H), 3.72 (s, 4H), 3.68 (s, 4H). <sup>13</sup>C NMR (500 MHz, CDCl<sub>3</sub>): δ (ppm) = 150.78, 149.82, 145.52, 134.42, 125.79, 123.89, 77.31, 77.06, 76.80, 74.95, 73.56, 70.75, 70.15. HRMS (EI): Calculated for C<sub>22</sub>H<sub>22</sub>O<sub>4</sub>N<sub>2</sub> [M]<sup>+</sup>: 379.16; Found: 379.15. Mp: 225.5 °C

### Single-crystal X-Ray crystallography.

Single-crystal X-ray diffraction experiments of **1·2CH<sub>2</sub>Cl<sub>2</sub>** (100 K, 180K, and 273 K) were performed on a Rigaku Oxford XtaLAB PRO diffractometer (Mo Kα, λ = 0.71073 Å) equipped with an Oxford Cryosystems Cryostream 800 apparatus. Structure solution and refinement were carried out by using the SHELXL program package and the non-hydrogen atoms (Fe, O, N, C)

were refined anisotropically by full-matrix least-squares techniques based on  $F^2$  values.<sup>3,4</sup> Hydrogen atoms were fixed geometrically at calculated positions and allowed to ride on the parent atoms. The relevant crystallographic data and structural refinement details for **1·2CH<sub>2</sub>Cl<sub>2</sub>** (100 K, 180K, and 273 K) were summarized in [Table S1](#). Selected bond lengths and angles for **1·2CH<sub>2</sub>Cl<sub>2</sub>** (100 K, 180K, and 273 K) were listed in [Table S2](#). Structural parameters for **1·2CH<sub>2</sub>Cl<sub>2</sub>** (100 K, 180K, and 273 K) were listed in [Table S3](#). The dihedral angle between pyridine and fused rings of **1·2CH<sub>2</sub>Cl<sub>2</sub>** (100 K, 180K, and 273 K) at various temperatures were listed in [Table S4](#). Full crystallographic data have been deposited under deposition numbers CCDC 2536196–2536198.

#### **Synthesis of [Fe(DPy-B12C4)(Ag(CN)<sub>2</sub>)<sub>2</sub>]·2(CH<sub>2</sub>Cl<sub>2</sub>) (1·2CH<sub>2</sub>Cl<sub>2</sub>).**

**1·2CH<sub>2</sub>Cl<sub>2</sub>** was synthesized using a liquid-liquid diffusion method in a test tube (8 mm inner diameter). A mixed solution of methanol/CH<sub>2</sub>Cl<sub>2</sub> (2 mL, v/v = 1:1) containing DPy-B12C4 (0.025 mmol, 9.5 mg) and NaAg(CN)<sub>2</sub> (0.05 mmol, 9.2 mg) was placed at the bottom, upon which a mixture of methanol and CH<sub>2</sub>Cl<sub>2</sub> (2 mL, v/v = 1:2) was added as buffer and then a methanol solution (2 mL) of Fe(ClO<sub>4</sub>)<sub>2</sub>·6H<sub>2</sub>O (0.025 mmol, 9.1 mg) was layered on the top. The test tube was sealed and put aside for one week; light yellow crystals were obtained. For DPy-B12C4, yield: ~52% (based on DPy-B12C4 ligand). FT-IR (KBr pellet, cm<sup>-1</sup>): 432, 727, 809, 899, 939, 1034, 1118, 1209, 1353, 1407, 1608, 2163, 2360, 2851, 3399.

## Additional Tables

**Table S1.** Crystallographic data and refinement details for **1·2CH<sub>2</sub>Cl<sub>2</sub>**.

| T / K                                                           | 273                                                                                             | 180                                                                                             | 100                                                                                             |
|-----------------------------------------------------------------|-------------------------------------------------------------------------------------------------|-------------------------------------------------------------------------------------------------|-------------------------------------------------------------------------------------------------|
| Empirical formula                                               | C <sub>28</sub> H <sub>25</sub> Ag <sub>2</sub> Cl <sub>4</sub> FeN <sub>6</sub> O <sub>4</sub> | C <sub>28</sub> H <sub>25</sub> Ag <sub>2</sub> Cl <sub>4</sub> FeN <sub>6</sub> O <sub>4</sub> | C <sub>28</sub> H <sub>25</sub> Ag <sub>2</sub> Cl <sub>4</sub> FeN <sub>6</sub> O <sub>4</sub> |
| Molecular weight                                                | 923.23                                                                                          | 923.23                                                                                          | 923.23                                                                                          |
| Crystal system                                                  | triclinic                                                                                       | triclinic                                                                                       | triclinic                                                                                       |
| Space group                                                     | <i>P</i> $\bar{1}$                                                                              | <i>P</i> $\bar{1}$                                                                              | <i>P</i> $\bar{1}$                                                                              |
| <i>a</i> /Å                                                     | 10.6155(2)                                                                                      | 10.6003(3)                                                                                      | 10.4318(3)                                                                                      |
| <i>b</i> /Å                                                     | 10.7142(3)                                                                                      | 10.7047(4)                                                                                      | 10.5213(3)                                                                                      |
| <i>c</i> /Å                                                     | 15.8128(3)                                                                                      | 15.7978(5)                                                                                      | 15.6031(4)                                                                                      |
| $\alpha$ /°                                                     | 86.857(2)                                                                                       | 86.570(3)                                                                                       | 87.313(2)                                                                                       |
| $\beta$ /°                                                      | 82.786(2)                                                                                       | 82.215(2)                                                                                       | 83.349(2)                                                                                       |
| $\gamma$ /°                                                     | 80.949(2)                                                                                       | 80.095(2)                                                                                       | 81.286(2)                                                                                       |
| <i>V</i> /Å <sup>3</sup>                                        | 1760.91(7)                                                                                      | 1748.40(10)                                                                                     | 1680.63(8)                                                                                      |
| <i>Z</i>                                                        | 2                                                                                               | 2                                                                                               | 2                                                                                               |
| $\rho_{\text{calc}}/\text{cm}^3$                                | 1.741                                                                                           | 1.753                                                                                           | 1.824                                                                                           |
| $\mu/\text{mm}^{-1}$                                            | 1.852                                                                                           | 1.865                                                                                           | 1.941                                                                                           |
| <i>F</i> (000)                                                  | 911.0                                                                                           | 910.0                                                                                           | 910.0                                                                                           |
| Goodness-of-fit on <i>F</i> <sup>2</sup>                        | 1.044                                                                                           | 1.042                                                                                           | 1.051                                                                                           |
| <i>R</i> <sub>1</sub> [ <i>I</i> ≥ 2σ( <i>I</i> )] <sup>a</sup> | 0.0387                                                                                          | 0.0390                                                                                          | 0.0489                                                                                          |
| <i>wR</i> <sub>2</sub> (all data) <sup>b</sup>                  | 0.1088                                                                                          | 0.1048                                                                                          | 0.1363                                                                                          |
| <i>R</i> <sub>int</sub> /%                                      | 0.0327                                                                                          | 0.0380                                                                                          | 0.0365                                                                                          |
| CCDC No.                                                        | 2536198                                                                                         | 2536197                                                                                         | 2536196                                                                                         |

$${}^a R_1 = \sum |F_o| - |F_c| / \sum |F_o|; {}^b wR_2 = [\sum w(F_o^2 - F_c^2)^2] / \sum w(F_o^2)^2]^{1/2}$$

**Table S2.** Selected bond lengths and angles for compound **1·2CH<sub>2</sub>Cl<sub>2</sub>** at various temperatures.

|               | 273 K      | 180 K      | 100        |
|---------------|------------|------------|------------|
| Fe1–N2#2      | 2.230(2)   | 2.224(2)   | 2.113(4)   |
| Fe1–N1        | 2.228(2)   | 2.222(2)   | 2.099(4)   |
| Fe1–N6#3      | 2.136(2)   | 2.129(2)   | 2.013(4)   |
| Fe1–N4        | 2.132(2)   | 2.128(2)   | 2.025(4)   |
| Fe1–N3        | 2.169(3)   | 2.175(3)   | 2.058(4)   |
| Fe1–N54       | 2.177(3)   | 2.164(3)   | 2.049(4)   |
| N1–Fe1–N2#2   | 174.39(9)  | 174.48(9)  | 174.15(14) |
| N6#3–Fe1–N2#2 | 92.41(9)   | 92.40(9)   | 92.59(14)  |
| N6#3–Fe1–N1   | 89.25(9)   | 89.24(9)   | 88.99(14)  |
| N6#3–Fe1–N3   | 89.61(11)  | 87.68(10)  | 88.45(15)  |
| N6#3–Fe1–N5#4 | 87.64(11)  | 89.78(10)  | 89.52(14)  |
| N4–Fe1–N2#2   | 91.42(9)   | 91.57(9)   | 91.03(14)  |
| N4–Fe1–N1     | 87.35(9)   | 87.21(9)   | 87.74(14)  |
| N4–Fe1–N6#3   | 174.17(10) | 174.09(10) | 175.56(13) |
| N4–Fe1–N3     | 94.86(11)  | 87.85(11)  | 95.14(15)  |
| N4–Fe1–N5#4   | 87.87(11)  | 94.68(11)  | 86.91(16)  |
| N3–Fe1–N2#2   | 89.00(9)   | 91.34(9)   | 90.61(14)  |
| N3–Fe1–N1     | 85.66(9)   | 93.99(9)   | 93.58(14)  |
| N3–Fe1–N5#4   | 177.22(10) | 177.46(10) | 177.95(15) |
| N5#4–Fe1–N2#2 | 91.49(9)   | 86.04(9)   | 89.20(14)  |
| N5#4–Fe1–N1   | 93.92(10)  | 88.70(9)   | 86.66(14)  |

Symmetric code: #1: 1-x, 1-y, 2-z; #2: +x, +y, 1+z; #3: -1+x, +y, +z; #4: +x, 1+y, +z.

**Table S3.** Structural parameters for **1·CH<sub>2</sub>Cl<sub>2</sub>** at various temperatures.

|                                     | 273K   | 180K   | 100K   |
|-------------------------------------|--------|--------|--------|
| Fe–N <sub>av</sub> (Å) <sup>a</sup> | 2.179  | 2.174  | 2.059  |
| Σ (°) <sup>b</sup>                  | 27.702 | 27.460 | 25.469 |
| Θ (°) <sup>c</sup>                  | 94.873 | 93.248 | 89.696 |
| Vol (Å <sup>3</sup> ) <sup>d</sup>  | 13.730 | 13.650 | 11.600 |

<sup>a</sup>Fe–N<sub>av</sub>: the average Fe–N bond lengths; <sup>b</sup>Σ<sub>Fe</sub> (octahedral distortion parameters): the sum of the deviations of N–Fe–N angles from 90°; <sup>c</sup>Θ: The sum of the deviation of 24 unique torsional angles between the ligand atoms on opposite triangular faces of the octahedron viewed along the pseudo-threefold axis from 60°; <sup>d</sup>Vol: the volume of the [FeN<sub>6</sub>] octahedron.

**Table S4.** The interaction between CH<sub>2</sub>Cl<sub>2</sub> molecules and host framework of **1**·CH<sub>2</sub>Cl<sub>2</sub> at various temperatures.

| <b>1</b> ·CH <sub>2</sub> Cl <sub>2</sub> | 273K  | 180K  | 100K  |
|-------------------------------------------|-------|-------|-------|
| d <sub>π</sub> 1 (Å) <sup>a</sup>         | 3.746 | 3.738 | 3.527 |
| d <sub>π</sub> 2 (Å)                      | 3.857 | 3.817 | 3.642 |
| d <sub>π</sub> 3 (Å)                      | 3.985 | 3.941 | 3.785 |
| d <sub>Ag</sub> 1 (Å) <sup>b</sup>        | 3.387 | 3.356 | 3.242 |
| d <sub>Ag</sub> 2 (Å)                     | 3.412 | 3.384 | 3.223 |

<sup>a</sup>d<sub>π</sub>: the distance of Cl··π interactions; <sup>b</sup>d<sub>Ag</sub>: the distance of Cl··Ag(I) interactions.

**Table S5.** The capture performance of **1**·CH<sub>2</sub>Cl<sub>2</sub> toward different metal ions determined by ICP analysis.

|                       | Li <sup>+</sup> / mg g <sup>-1</sup> | Na <sup>+</sup> / mg g <sup>-1</sup> | Mg <sup>2+</sup> / mg g <sup>-1</sup> |
|-----------------------|--------------------------------------|--------------------------------------|---------------------------------------|
| C <sub>0</sub> = 0.5M | 12.4                                 |                                      |                                       |
| C <sub>0</sub> = 0.1M | 9.7                                  | 1.1                                  | 0.7                                   |

Condition: C<sub>0</sub> = the initial concentration, room temperature, 24h, Solvent = DCM/MeOH (1:1).

**Table S6.** Cartesian coordinates of the optimized structure of **1**.

| Atom number | Element | X        | Y        | Z        |
|-------------|---------|----------|----------|----------|
| 1           | N       | -8.5293  | 0.710253 | -1.70942 |
| 2           | C       | -8.60636 | 1.528574 | -2.56852 |
| 3           | Fe      | -8.27989 | -0.71318 | -0.05229 |
| 4           | N       | -10.2807 | -0.79043 | 0.032814 |
| 5           | N       | -8.2259  | -2.0961  | 1.581893 |
| 6           | N       | -8.39492 | 0.965424 | 1.334516 |
| 7           | C       | -8.2213  | -2.88033 | 2.475122 |
| 8           | C       | -8.48961 | 1.90001  | 2.006119 |
| 9           | C       | -10.9187 | -0.84883 | 1.228579 |
| 10          | H       | -10.286  | -0.90469 | 2.096313 |
| 11          | C       | -11.0233 | -0.79003 | -1.10218 |
| 12          | H       | -10.4753 | -0.67901 | -2.02065 |
| 13          | C       | -13.0711 | -0.9103  | 0.155344 |
| 14          | C       | -12.3057 | -0.90744 | 1.3224   |
| 15          | H       | -12.7688 | -0.96662 | 2.296364 |
| 16          | C       | -12.4131 | -0.85102 | -1.07399 |
| 17          | H       | -12.9629 | -0.83457 | -2.00355 |
| 18          | N       | -8.35594 | -2.34786 | -1.46099 |
| 19          | C       | -8.39382 | -3.24345 | -2.18899 |
| 20          | N       | 8.007661 | 0.453083 | -1.53516 |
| 21          | C       | 8.059807 | 1.187894 | -2.42478 |
| 22          | Fe      | 8.086283 | -0.91351 | 0.076342 |
| 23          | O       | -1.37188 | 1.781766 | -0.06582 |

|    |   |          |          |          |
|----|---|----------|----------|----------|
| 24 | O | 1.370696 | 1.67766  | -0.13467 |
| 25 | N | -6.00135 | -0.67958 | -0.09919 |
| 26 | N | 5.821942 | -0.92568 | 0.119679 |
| 27 | N | 8.365831 | -2.35285 | 1.75067  |
| 28 | N | 8.201993 | 0.709823 | 1.507297 |
| 29 | O | -0.67761 | 4.673741 | 0.013457 |
| 30 | C | 8.516588 | -3.01735 | 2.682745 |
| 31 | C | -3.09137 | -0.63847 | -0.0691  |
| 32 | C | 0.662603 | 0.478365 | -0.07917 |
| 33 | C | -5.26298 | -1.66987 | 0.48058  |
| 34 | H | -5.83368 | -2.44372 | 0.969674 |
| 35 | C | -5.27947 | 0.325029 | -0.6733  |
| 36 | H | -5.86235 | 1.086853 | -1.16905 |
| 37 | C | -0.75995 | 0.518646 | -0.05651 |
| 38 | C | -1.56578 | -0.64763 | -0.04593 |
| 39 | C | -3.86043 | -1.67788 | 0.509438 |
| 40 | H | -3.3819  | -2.49674 | 1.027777 |
| 41 | C | -3.8766  | 0.375584 | -0.6757  |
| 42 | H | -3.39711 | 1.209507 | -1.15876 |
| 43 | O | 2.388008 | 4.399114 | -0.15554 |
| 44 | C | 8.299609 | 1.557624 | 2.335191 |
| 45 | C | 5.12966  | 0.158663 | 0.57486  |
| 46 | H | 5.733965 | 0.949654 | 0.991727 |
| 47 | C | 1.394801 | -0.73274 | 0.012853 |
| 48 | C | 5.05632  | -1.94712 | -0.36231 |
| 49 | H | 5.605093 | -2.78926 | -0.75579 |
| 50 | C | -0.82065 | -1.85301 | 0.01105  |
| 51 | H | -1.34833 | -2.79667 | 0.010948 |
| 52 | C | 2.91721  | -0.7922  | 0.0524   |
| 53 | C | 3.730205 | 0.256217 | 0.552657 |
| 54 | H | 3.277884 | 1.160178 | 0.925135 |
| 55 | C | 0.579948 | -1.89138 | 0.059884 |
| 56 | H | 1.051716 | -2.86076 | 0.142282 |
| 57 | C | 3.653648 | -1.91326 | -0.40573 |
| 58 | H | 3.15179  | -2.76658 | -0.83973 |
| 59 | C | -1.25789 | 2.583294 | 1.174319 |
| 60 | H | -0.23095 | 2.546344 | 1.534937 |
| 61 | H | -1.93196 | 2.152524 | 1.919083 |
| 62 | C | -1.67319 | 3.997914 | 0.831165 |
| 63 | H | -2.59049 | 3.984569 | 0.245622 |
| 64 | H | -1.85646 | 4.559361 | 1.754173 |
| 65 | C | 0.334211 | 5.428622 | 0.745188 |
| 66 | H | 0.625244 | 4.910829 | 1.662825 |
| 67 | C | 1.55901  | 5.595449 | -0.12961 |
| 68 | H | 1.261787 | 5.892148 | -1.14002 |
| 69 | H | 2.192018 | 6.376056 | 0.296079 |
| 70 | C | 1.19743  | 2.54644  | -1.32731 |
| 71 | H | 0.232836 | 3.037616 | -1.27526 |
| 72 | H | 1.259878 | 1.917285 | -2.21921 |
| 73 | C | 2.336194 | 3.544172 | -1.32758 |
| 74 | H | 3.293262 | 3.026502 | -1.33564 |
| 75 | H | 2.257278 | 4.15496  | -2.23655 |
| 76 | N | 8.170755 | -2.6042  | -1.28723 |
| 77 | C | 8.21201  | -3.51083 | -2.05521 |
| 78 | N | 10.08712 | -0.83868 | -0.02834 |
| 79 | C | 12.87595 | -0.71541 | -0.18235 |
| 80 | C | 10.82356 | -1.97138 | -0.15092 |
| 81 | H | 10.26469 | -2.88552 | -0.2411  |
| 82 | C | 10.73054 | 0.354943 | 0.018239 |
| 83 | H | 10.10761 | 1.217419 | 0.175026 |
| 84 | C | 12.21277 | -1.94254 | -0.22761 |
| 85 | H | 12.75612 | -2.86955 | -0.3373  |
| 86 | C | 12.11657 | 0.449078 | -0.05814 |

|    |   |          |          |          |
|----|---|----------|----------|----------|
| 87 | H | 12.58536 | 1.420622 | -0.00391 |
| 88 | H | 13.95453 | -0.66776 | -0.24175 |
| 89 | H | -14.1502 | -0.95692 | 0.202634 |
| 90 | H | -8.63276 | 2.705732 | 2.683576 |
| 91 | H | -8.49704 | -4.05101 | -2.87156 |
| 92 | H | 8.191099 | 1.944401 | -3.1588  |
| 93 | H | 8.72583  | -3.68618 | 3.481357 |
| 94 | H | -0.07667 | 6.411863 | 1.003207 |

**Table S7.** Cartesian coordinates of the optimized structure of **1**+Li<sup>+</sup>.

| Atom number | Element | X        | Y        | Z        |
|-------------|---------|----------|----------|----------|
| 1           | N       | 8.420459 | 1.35997  | 0.502052 |
| 2           | C       | 8.503179 | 2.515551 | 0.700654 |
| 3           | Fe      | 8.166821 | -0.7677  | 0.03611  |
| 4           | N       | 10.17317 | -0.91596 | 0.03636  |
| 5           | N       | 8.082627 | -2.86441 | -0.41496 |
| 6           | N       | 8.286559 | -0.2819  | -2.07381 |
| 7           | C       | 8.081827 | -4.02791 | -0.58224 |
| 8           | C       | 8.465914 | 0.050812 | -3.16534 |
| 9           | C       | 10.8149  | -1.63807 | -0.91948 |
| 10          | H       | 10.19197 | -2.12799 | -1.64632 |
| 11          | C       | 10.92338 | -0.3081  | 0.992398 |
| 12          | H       | 10.38785 | 0.274182 | 1.720608 |
| 13          | C       | 12.96631 | -1.14526 | 0.037026 |
| 14          | C       | 12.19839 | -1.77203 | -0.94585 |
| 15          | H       | 12.66026 | -2.36487 | -1.72106 |
| 16          | C       | 12.31024 | -0.4015  | 1.01935  |
| 17          | H       | 12.86211 | 0.106625 | 1.795879 |
| 18          | N       | 8.212219 | -1.22043 | 2.157965 |
| 19          | C       | 8.314416 | -1.58087 | 3.250512 |
| 20          | N       | -8.11849 | 1.206911 | 0.416102 |
| 21          | C       | -8.19847 | 2.299067 | 0.784654 |
| 22          | Fe      | -8.22146 | -0.86462 | -0.04078 |
| 23          | O       | 1.160597 | 1.85318  | -0.06674 |
| 24          | O       | -1.41807 | 1.740573 | 0.034097 |
| 25          | N       | 5.874694 | -0.69168 | 0.019753 |
| 26          | N       | -5.91899 | -0.90781 | -0.05588 |
| 27          | N       | -8.51108 | -3.01328 | -0.49715 |
| 28          | N       | -8.31232 | -0.43222 | -2.15991 |
| 29          | C       | -8.70753 | -4.1012  | -0.83066 |
| 30          | C       | 2.981519 | -0.65014 | -0.03016 |
| 31          | C       | -0.75905 | 0.482696 | -0.00523 |
| 32          | C       | 5.154259 | -1.3185  | -0.95197 |
| 33          | H       | 5.728752 | -1.84367 | -1.69811 |
| 34          | C       | 5.141219 | -0.05656 | 0.977012 |
| 35          | H       | 5.705944 | 0.43417  | 1.753986 |
| 36          | C       | 0.661451 | 0.531257 | -0.0597  |
| 37          | C       | 1.452853 | -0.63576 | -0.06149 |
| 38          | C       | 3.751027 | -1.31916 | -1.00568 |
| 39          | H       | 3.270909 | -1.83858 | -1.82312 |
| 40          | C       | 3.737928 | -0.01738 | 0.983003 |
| 41          | H       | 3.244222 | 0.502878 | 1.792253 |
| 42          | O       | -1.16181 | 4.377641 | 0.227006 |
| 43          | C       | -8.41998 | -0.30058 | -3.32311 |
| 44          | C       | -5.22665 | 0.013067 | -0.785   |
| 45          | H       | -5.82412 | 0.672294 | -1.39448 |
| 46          | C       | -1.49879 | -0.71535 | -0.02577 |
| 47          | C       | -5.15532 | -1.76794 | 0.674169 |
| 48          | H       | -5.69491 | -2.49461 | 1.260903 |
| 49          | C       | 0.706418 | -1.83996 | -0.0739  |
| 50          | H       | 1.246212 | -2.77671 | -0.08023 |
| 51          | C       | -3.02367 | -0.76815 | -0.02956 |
| 52          | C       | -3.82832 | 0.110884 | -0.79214 |

|    |    |          |          |          |
|----|----|----------|----------|----------|
| 53 | H  | -3.37534 | 0.870929 | -1.40861 |
| 54 | C  | -0.69671 | -1.88202 | -0.06364 |
| 55 | H  | -1.17827 | -2.84868 | -0.09957 |
| 56 | C  | -3.75111 | -1.72847 | 0.70864  |
| 57 | H  | -3.24134 | -2.44392 | 1.33854  |
| 58 | C  | 2.353939 | 2.278779 | -0.84041 |
| 59 | H  | 2.20372  | 2.017231 | -1.88918 |
| 60 | H  | 3.254824 | 1.802335 | -0.46572 |
| 61 | C  | 2.417995 | 3.77431  | -0.62918 |
| 62 | H  | 2.572606 | 4.000484 | 0.427496 |
| 63 | H  | 3.230449 | 4.205118 | -1.21592 |
| 64 | C  | 0.698299 | 5.623124 | -0.54969 |
| 65 | H  | 0.151862 | 6.085985 | -1.36659 |
| 66 | C  | -0.20525 | 5.408288 | 0.658936 |
| 67 | H  | 0.348051 | 5.051876 | 1.53091  |
| 68 | H  | -0.73286 | 6.328364 | 0.912724 |
| 69 | C  | -1.62481 | 2.317621 | 1.402892 |
| 70 | H  | -0.67502 | 2.262503 | 1.934139 |
| 71 | H  | -2.38055 | 1.730345 | 1.922333 |
| 72 | C  | -2.07536 | 3.75036  | 1.187887 |
| 73 | H  | -3.06512 | 3.791716 | 0.739605 |
| 74 | H  | -2.08989 | 4.292993 | 2.134316 |
| 75 | N  | -8.31645 | -1.37261 | 2.07197  |
| 76 | C  | -8.411   | -1.59962 | 3.221423 |
| 77 | N  | -10.2286 | -0.72137 | -0.01535 |
| 78 | C  | -13.0236 | -0.51615 | 0.008637 |
| 79 | C  | -10.9884 | -1.61704 | 0.667757 |
| 80 | H  | -10.4565 | -2.38137 | 1.20526  |
| 81 | C  | -10.8615 | 0.276622 | -0.68651 |
| 82 | H  | -10.2339 | 0.951919 | -1.24044 |
| 83 | C  | -12.3765 | -1.54144 | 0.700118 |
| 84 | H  | -12.935  | -2.27349 | 1.263959 |
| 85 | C  | -12.2457 | 0.404766 | -0.69557 |
| 86 | H  | -12.7018 | 1.209074 | -1.2532  |
| 87 | H  | -14.1013 | -0.43788 | 0.01686  |
| 88 | H  | 14.0432  | -1.23431 | 0.037792 |
| 89 | H  | 8.653082 | 0.372632 | -4.16343 |
| 90 | H  | 8.4215   | -1.93679 | 4.24894  |
| 91 | H  | -8.30008 | 3.295667 | 1.144968 |
| 92 | H  | -8.8993  | -5.0984  | -1.15283 |
| 93 | H  | 1.564341 | 6.237847 | -0.30543 |
| 94 | Li | -0.32138 | 3.085269 | -0.85091 |
| 95 | O  | 1.128646 | 4.309049 | -1.07309 |

**Table S8.** Cartesian coordinates of the optimized structure of **1+Mg<sup>2+</sup>**.

| Atom number | Element | X        | Y        | Z        |
|-------------|---------|----------|----------|----------|
| 1           | N       | 8.446624 | 1.247815 | 0.501269 |
| 2           | C       | 8.723524 | 2.356846 | 0.667319 |
| 3           | Fe      | 8.187978 | -0.87809 | 0.037866 |
| 4           | N       | 10.20562 | -1.02743 | 0.040566 |
| 5           | N       | 8.115112 | -2.97874 | -0.40799 |
| 6           | N       | 8.31492  | -0.39897 | -2.07157 |
| 7           | C       | 8.157108 | -4.12432 | -0.54852 |
| 8           | C       | 8.495546 | -0.08202 | -3.16752 |
| 9           | C       | 10.85869 | -1.70964 | -0.94321 |
| 10          | H       | 10.25161 | -2.15227 | -1.71358 |
| 11          | C       | 10.95852 | -0.46226 | 1.026946 |
| 12          | H       | 10.42934 | 0.070467 | 1.797639 |
| 13          | C       | 13.00534 | -1.2594  | 0.045291 |
| 14          | C       | 12.24172 | -1.84178 | -0.96891 |
| 15          | H       | 12.70993 | -2.39304 | -1.77037 |
| 16          | C       | 12.34441 | -0.55917 | 1.057126 |
| 17          | H       | 12.89417 | -0.0942  | 1.861508 |
| 18          | N       | 8.242504 | -1.32987 | 2.161919 |

|    |    |          |          |          |
|----|----|----------|----------|----------|
| 19 | C  | 8.34977  | -1.67885 | 3.257758 |
| 20 | N  | -8.09208 | 1.069443 | 0.417585 |
| 21 | C  | -8.19103 | 2.169012 | 0.756714 |
| 22 | Fe | -8.18947 | -1.00237 | -0.03573 |
| 23 | O  | 1.128017 | 1.909809 | -0.0334  |
| 24 | O  | -1.43885 | 1.741349 | 0.122496 |
| 25 | N  | 5.891314 | -0.75616 | 0.013785 |
| 26 | N  | -5.88488 | -1.00974 | -0.04854 |
| 27 | N  | -8.47836 | -3.153   | -0.48791 |
| 28 | N  | -8.28372 | -0.57469 | -2.1554  |
| 29 | C  | -8.67458 | -4.24521 | -0.80826 |
| 30 | C  | 2.997807 | -0.62092 | -0.05166 |
| 31 | C  | -0.75468 | 0.499933 | 0.041143 |
| 32 | C  | 5.1553   | -1.31925 | -0.9888  |
| 33 | H  | 5.709451 | -1.81737 | -1.7684  |
| 34 | C  | 5.16633  | -0.13802 | 0.992996 |
| 35 | H  | 5.730509 | 0.294952 | 1.804144 |
| 36 | C  | 0.665294 | 0.575127 | -0.03874 |
| 37 | C  | 1.469595 | -0.58835 | -0.07951 |
| 38 | C  | 3.754326 | -1.27385 | -1.04888 |
| 39 | H  | 3.264902 | -1.7439  | -1.89003 |
| 40 | C  | 3.766162 | -0.05493 | 0.991364 |
| 41 | H  | 3.2836   | 0.439025 | 1.822874 |
| 42 | O  | -1.25925 | 4.411612 | 0.35691  |
| 43 | C  | -8.43017 | -0.48314 | -3.29744 |
| 44 | C  | -5.20914 | -0.03997 | -0.73388 |
| 45 | H  | -5.81166 | 0.648937 | -1.30396 |
| 46 | C  | -1.47097 | -0.71323 | -0.00691 |
| 47 | C  | -5.09858 | -1.88416 | 0.644456 |
| 48 | H  | -5.61019 | -2.66302 | 1.187764 |
| 49 | C  | 0.741468 | -1.80265 | -0.11874 |
| 50 | H  | 1.291366 | -2.73274 | -0.15697 |
| 51 | C  | -2.99236 | -0.7995  | -0.00806 |
| 52 | C  | -3.81591 | 0.091937 | -0.73344 |
| 53 | H  | -3.38081 | 0.892303 | -1.30988 |
| 54 | C  | -0.65752 | -1.86731 | -0.09281 |
| 55 | H  | -1.12256 | -2.84082 | -0.15493 |
| 56 | C  | -3.69711 | -1.81014 | 0.684126 |
| 57 | H  | -3.17081 | -2.54438 | 1.27713  |
| 58 | C  | 2.270913 | 2.411571 | -0.84433 |
| 59 | H  | 2.091706 | 2.167721 | -1.8927  |
| 60 | H  | 3.20207  | 1.96196  | -0.51389 |
| 61 | C  | 2.296378 | 3.90861  | -0.6067  |
| 62 | H  | 2.478284 | 4.120861 | 0.448837 |
| 63 | H  | 3.07916  | 4.370828 | -1.2101  |
| 64 | C  | 0.543034 | 5.725953 | -0.45093 |
| 65 | H  | -0.03383 | 6.1887   | -1.24639 |
| 66 | C  | -0.31836 | 5.465946 | 0.77908  |
| 67 | H  | 0.270491 | 5.108957 | 1.627282 |
| 68 | H  | -0.86262 | 6.365472 | 1.066745 |
| 69 | C  | -1.61321 | 2.309747 | 1.506908 |
| 70 | H  | -0.64377 | 2.275528 | 2.002385 |
| 71 | H  | -2.33048 | 1.694463 | 2.048055 |
| 72 | C  | -2.11426 | 3.73509  | 1.334657 |
| 73 | H  | -3.12205 | 3.757473 | 0.926691 |
| 74 | H  | -2.10882 | 4.256405 | 2.292921 |
| 75 | N  | -8.28592 | -1.50734 | 2.078187 |
| 76 | C  | -8.41952 | -1.72186 | 3.20522  |
| 77 | N  | -10.2089 | -0.86366 | -0.01432 |
| 78 | C  | -13.0112 | -0.66345 | 0.002488 |
| 79 | C  | -10.9784 | -1.79004 | 0.624665 |
| 80 | H  | -10.4616 | -2.59656 | 1.114077 |
| 81 | C  | -10.8468 | 0.163336 | -0.64526 |
| 82 | H  | -10.2269 | 0.884321 | -1.14948 |
| 83 | C  | -12.3661 | -1.71868 | 0.650949 |
| 84 | H  | -12.929  | -2.47944 | 1.170382 |
| 85 | C  | -12.2304 | 0.290063 | -0.65515 |
| 86 | H  | -12.6865 | 1.121343 | -1.17132 |

|    |    |          |          |          |
|----|----|----------|----------|----------|
| 87 | H  | -14.0885 | -0.58729 | 0.007932 |
| 88 | H  | 14.08167 | -1.34922 | 0.047558 |
| 89 | H  | 8.678579 | 0.204673 | -4.18229 |
| 90 | H  | 8.46397  | -2.0007  | 4.272171 |
| 91 | H  | -8.30405 | 3.185924 | 1.067698 |
| 92 | H  | -8.87056 | -5.25604 | -1.10047 |
| 93 | H  | 1.399503 | 6.358138 | -0.21953 |
| 94 | Mg | -0.43006 | 3.178165 | -0.78646 |
| 95 | O  | 0.989042 | 4.425524 | -1.00728 |

**Table S9.** Cartesian coordinates of the optimized structure of **1+Na<sup>+</sup>**.

| Atom number | Element | X        | Y        | Z        |
|-------------|---------|----------|----------|----------|
| 1           | N       | 8.412754 | 0.929173 | 1.308919 |
| 2           | C       | 8.318557 | 1.947697 | 1.903214 |
| 3           | Fe      | 8.178353 | -0.86966 | 0.059964 |
| 4           | N       | 10.17751 | -0.986   | 0.0077   |
| 5           | N       | 8.076906 | -2.61163 | -1.17103 |
| 6           | N       | 8.279767 | 0.411607 | -1.70158 |
| 7           | C       | 7.88941  | -3.55937 | -1.85273 |
| 8           | C       | 8.482559 | 1.141226 | -2.57332 |
| 9           | C       | 10.81385 | -1.57471 | -1.04227 |
| 10          | H       | 10.17565 | -2.0044  | -1.79449 |
| 11          | C       | 10.92868 | -0.48766 | 1.028018 |
| 12          | H       | 10.38063 | 0.019556 | 1.802661 |
| 13          | C       | 12.97018 | -1.16798 | -0.05243 |
| 14          | C       | 12.20106 | -1.66933 | -1.10335 |
| 15          | H       | 12.66247 | -2.14216 | -1.95755 |
| 16          | C       | 12.31788 | -0.57384 | 1.028865 |
| 17          | H       | 12.87297 | -0.16901 | 1.862057 |
| 18          | N       | 8.205585 | -2.09099 | 1.837566 |
| 19          | C       | 8.307589 | -2.82534 | 2.722535 |
| 20          | N       | -8.12611 | 0.81471  | 1.166568 |
| 21          | C       | -8.17054 | 1.726582 | 1.873707 |
| 22          | Fe      | -8.25156 | -0.9225  | -0.0538  |
| 23          | O       | 1.169154 | 1.791989 | -0.06551 |
| 24          | O       | -1.49192 | 1.644593 | -0.03713 |
| 25          | N       | 5.871431 | -0.81822 | 0.085807 |
| 26          | N       | -5.92298 | -0.97588 | -0.08453 |
| 27          | N       | -8.51672 | -2.72371 | -1.3083  |
| 28          | N       | -8.31903 | 0.299707 | -1.84302 |
| 29          | C       | -8.73741 | -3.6005  | -2.02596 |
| 30          | C       | 2.98011  | -0.7609  | 0.031991 |
| 31          | C       | -0.76536 | 0.418878 | -0.02939 |
| 32          | C       | 5.15469  | -1.38304 | -0.92773 |
| 33          | H       | 5.737884 | -1.88984 | -1.68084 |
| 34          | C       | 5.139113 | -0.26301 | 1.095321 |
| 35          | H       | 5.711453 | 0.197646 | 1.886668 |
| 36          | C       | 0.661025 | 0.468568 | -0.06092 |
| 37          | C       | 1.447488 | -0.71081 | -0.02559 |
| 38          | C       | 3.749519 | -1.36228 | -0.98606 |
| 39          | H       | 3.268318 | -1.81907 | -1.83968 |
| 40          | C       | 3.734425 | -0.23222 | 1.106168 |
| 41          | H       | 3.237467 | 0.210936 | 1.958043 |
| 42          | O       | -1.22469 | 4.578707 | 0.274119 |
| 43          | C       | -8.18226 | 0.978813 | -2.80106 |
| 44          | C       | -5.22873 | -0.06623 | -0.82909 |
| 45          | H       | -5.83215 | 0.566142 | -1.46363 |
| 46          | C       | -1.50081 | -0.78688 | -0.03534 |
| 47          | C       | -5.16815 | -1.83018 | 0.664057 |
| 48          | H       | -5.72357 | -2.51965 | 1.282463 |
| 49          | C       | 0.696764 | -1.91176 | -0.04065 |
| 50          | H       | 1.236561 | -2.84883 | -0.02949 |
| 51          | C       | -3.0303  | -0.84322 | -0.05105 |

|    |    |          |          |          |
|----|----|----------|----------|----------|
| 52 | C  | -3.82935 | 0.026186 | -0.82988 |
| 53 | H  | -3.37186 | 0.777296 | -1.45346 |
| 54 | C  | -0.70265 | -1.95441 | -0.05087 |
| 55 | H  | -1.18733 | -2.92024 | -0.07996 |
| 56 | C  | -3.76147 | -1.79392 | 0.697678 |
| 57 | H  | -3.25355 | -2.50285 | 1.336715 |
| 58 | C  | 2.396427 | 2.27996  | -0.73709 |
| 59 | H  | 2.312704 | 2.111956 | -1.81235 |
| 60 | H  | 3.27266  | 1.765354 | -0.35908 |
| 61 | C  | 2.517651 | 3.747592 | -0.3849  |
| 62 | H  | 2.538048 | 3.86624  | 0.699595 |
| 63 | H  | 3.450496 | 4.126495 | -0.80492 |
| 64 | C  | 0.899002 | 5.678359 | -0.24058 |
| 65 | H  | 0.439844 | 6.29085  | -1.01212 |
| 66 | C  | -0.10568 | 5.339243 | 0.864602 |
| 67 | H  | 0.368655 | 4.775052 | 1.673271 |
| 68 | H  | -0.48864 | 6.276724 | 1.271691 |
| 69 | C  | -1.66554 | 2.300218 | 1.288146 |
| 70 | H  | -0.72044 | 2.229639 | 1.829522 |
| 71 | H  | -2.43481 | 1.765817 | 1.846836 |
| 72 | C  | -2.10449 | 3.757624 | 1.133062 |
| 73 | H  | -3.08678 | 3.842984 | 0.677414 |
| 74 | H  | -2.14461 | 4.174729 | 2.143023 |
| 75 | N  | -8.323   | -2.20462 | 1.69552  |
| 76 | C  | -8.15743 | -2.86793 | 2.660311 |
| 77 | N  | -10.2564 | -0.79763 | 0.030147 |
| 78 | C  | -13.0509 | -0.63012 | 0.139959 |
| 79 | C  | -10.9921 | -1.78722 | 0.608507 |
| 80 | H  | -10.4277 | -2.58668 | 1.054732 |
| 81 | C  | -10.912  | 0.275274 | -0.49369 |
| 82 | H  | -10.2952 | 1.002154 | -0.99163 |
| 83 | C  | -12.3817 | -1.73469 | 0.667736 |
| 84 | H  | -12.9217 | -2.54642 | 1.132065 |
| 85 | C  | -12.2981 | 0.389324 | -0.44417 |
| 86 | H  | -12.7728 | 1.260251 | -0.87126 |
| 87 | H  | -14.1292 | -0.56604 | 0.181466 |
| 88 | H  | 14.04853 | -1.23916 | -0.07523 |
| 89 | H  | 8.65359  | 1.772958 | -3.41392 |
| 90 | H  | 8.427241 | -3.4495  | 3.57773  |
| 91 | H  | -8.20363 | 2.628561 | 2.438688 |
| 92 | H  | -8.97924 | -4.41833 | -2.66444 |
| 93 | H  | 1.724318 | 6.238702 | 0.204372 |
| 94 | Na | -0.32236 | 3.16825  | -1.08283 |
| 95 | O  | 1.399767 | 4.503961 | -0.96458 |

## Additional Figures

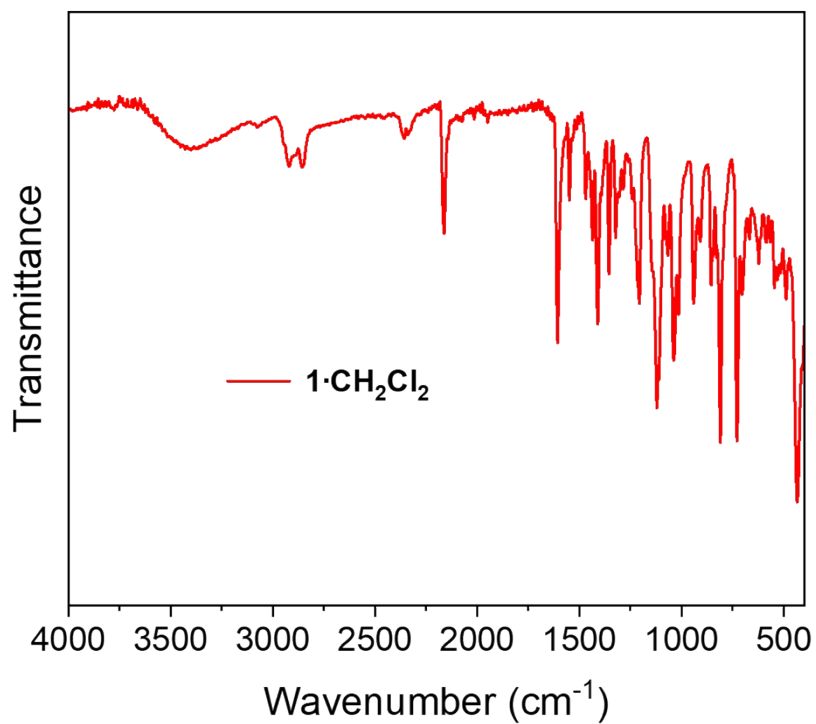

Fig. S1 The FT-IR spectra of 1·CH<sub>2</sub>Cl<sub>2</sub>.

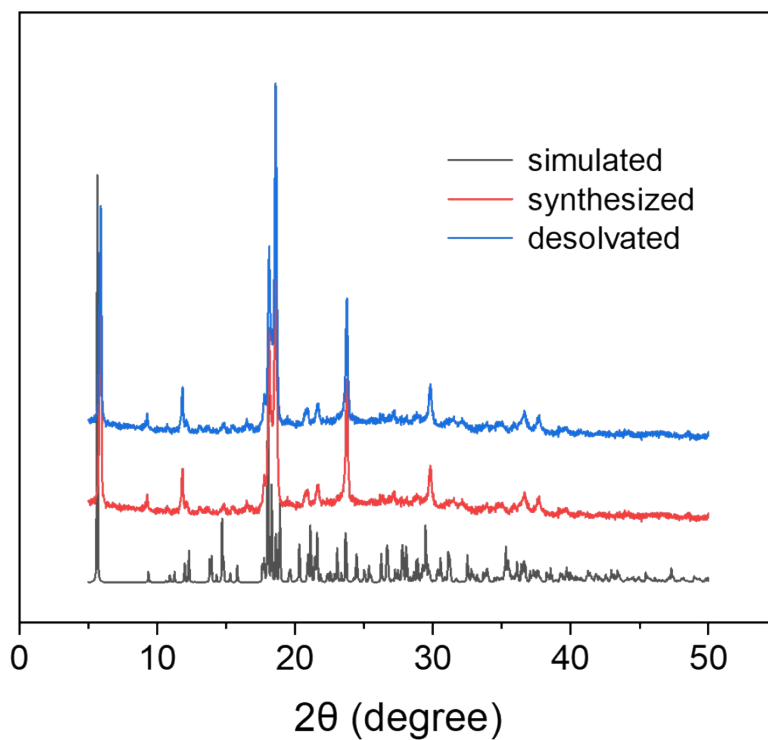

Fig. S2 Powder X-ray diffraction data of 1·CH<sub>2</sub>Cl<sub>2</sub> and desolvated 1.

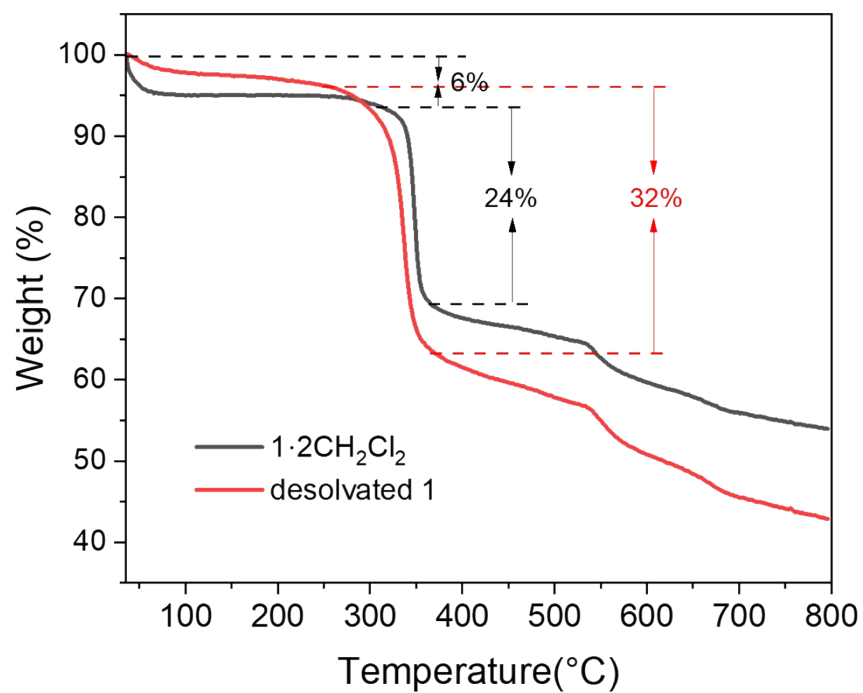

Fig. S3 TG curve for  $1 \cdot \text{CH}_2\text{Cl}_2$  and desolvated **1**.

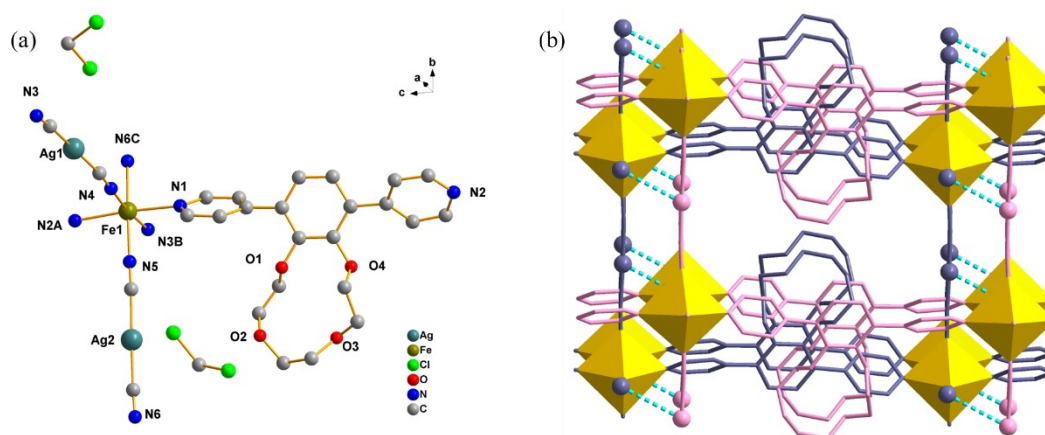

Fig. S4 (a) The asymmetric unit of  $1 \cdot \text{CH}_2\text{Cl}_2$  (symmetric code: A:  $-x, y, 1+z$ ; B:  $-1x, y, z$ ; C:  $x, 1+y, z$ ); (b) the argentophilic interactions in  $1 \cdot \text{CH}_2\text{Cl}_2$ .

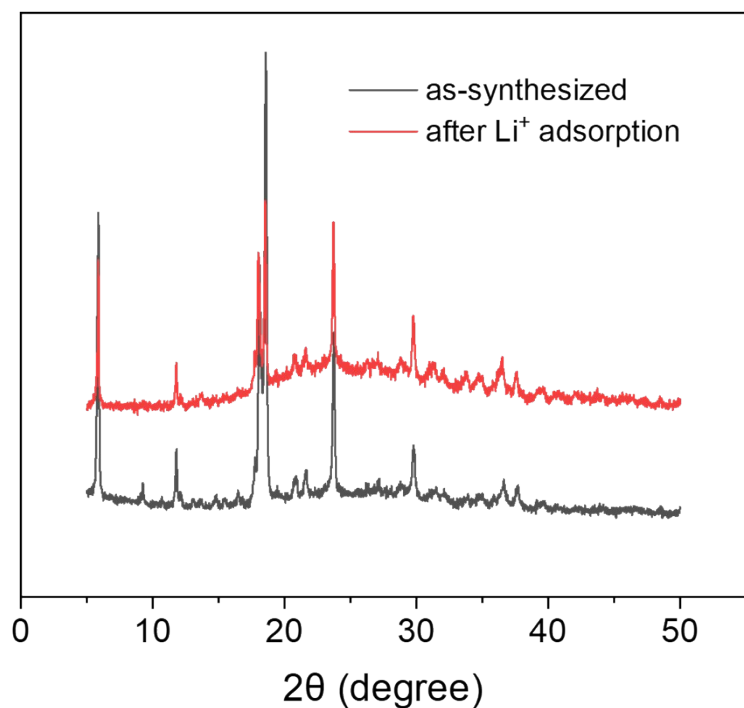

**Fig. S5** Powder X-ray diffraction data of  $1 \cdot \text{CH}_2\text{Cl}_2$  before (black) and after (red)  $\text{Li}^+$  adsorption.

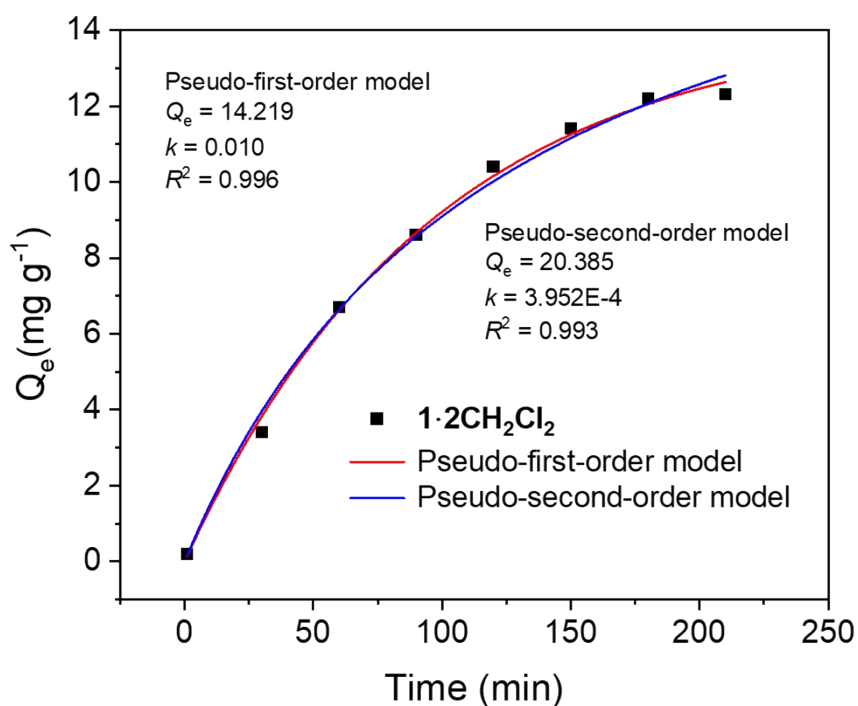

**Fig. S6** Adsorption kinetics curve of  $1 \cdot 2\text{CH}_2\text{Cl}_2$  for  $\text{Li}^+$  ion (condition:  $C_0 = 0.5\text{M}$ ;  $T = 300\text{ K}$ ; Solvent = DCM/MeOH (1:1)).

To elucidate the kinetic mechanism of the  $\text{Li}^+$  ions adsorption process, the adsorption data were fitted using pseudo-first-order and pseudo-second-order kinetic models. The two kinetic models

are described as the following equations:

$$Q_t = Q_e(1 - e^{-k_1 t}) \quad (2)$$

$$Q_t = \frac{k_2 Q_e^2 t}{1 + k_2 Q_e t} \quad (3)$$

where  $Q_t$  and  $Q_e$  refer to  $\text{Li}^+$  ion adsorption amount at  $t$  (min) and equilibrium time;  $k_1$  and  $k_2$  are the rate constants of the pseudo-first-order kinetic model and the pseudo-second-order kinetic model. The fitting results indicate that both models provide satisfactory descriptions of the entire adsorption process, with high correlation coefficients ( $R^2 > 0.99$ ). The good fit of the pseudo-first-order model suggests a potential contribution from physical diffusion processes during the initial stage of adsorption, while the excellent agreement with the pseudo-second-order model reveals that chemisorption is the predominant rate-controlling mechanism throughout the process. This finding is consistent with the specific binding of  $\text{Li}^+$  ions through ion-dipole interactions with the crown ether moieties, which is characteristic of chemisorption. The applicability of both models in describing the adsorption behavior reflects a synergistic effect involving both physical diffusion and chemical complexation during the adsorption process.

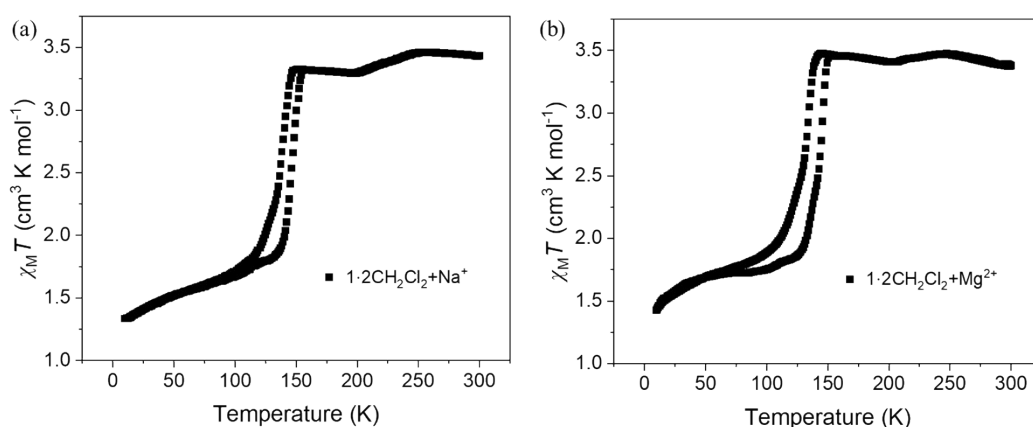

**Fig. S7** Magnetic susceptibility curves of  $1:2\text{CH}_2\text{Cl}_2$  after immersion in  $\text{Na}^+$  (a) and  $\text{Mg}^{2+}$  (b) solutions.

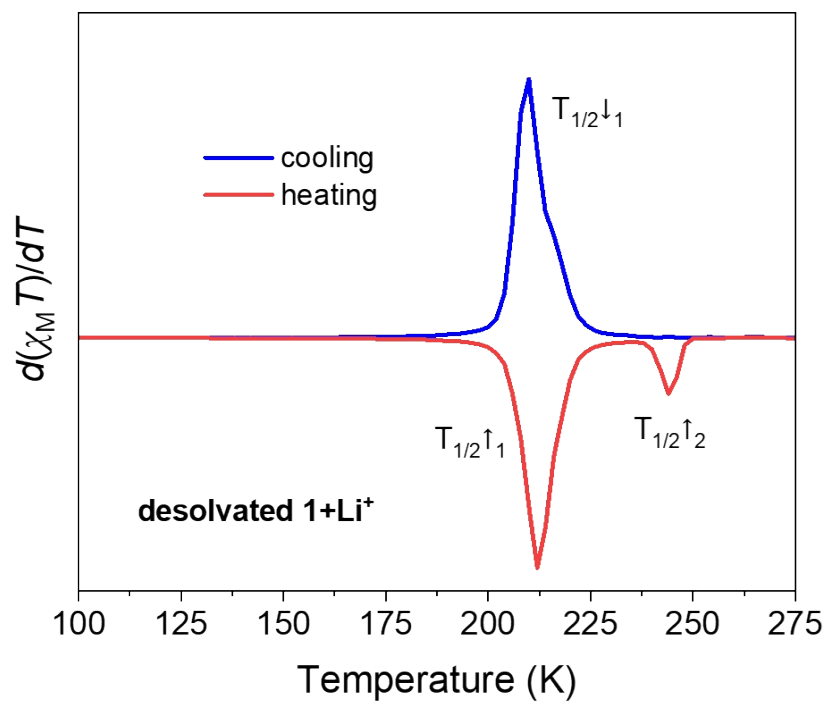

**Fig. S8** The first-order derivative of  $\chi_M T$  product for **1**+Li<sup>+</sup>.

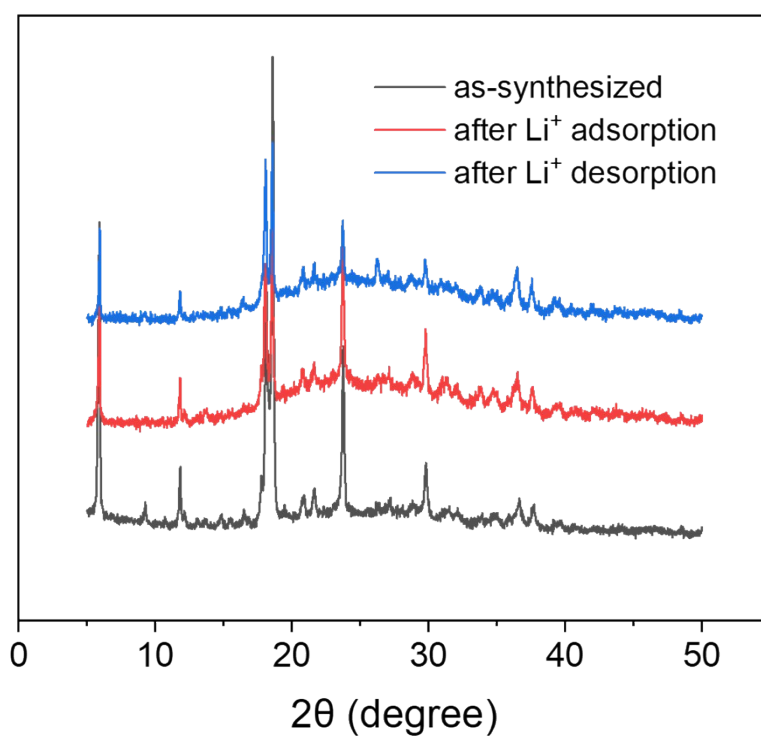

**Fig. S9** PXRD patterns of **1** upon Li<sup>+</sup> adsorption and desorption.

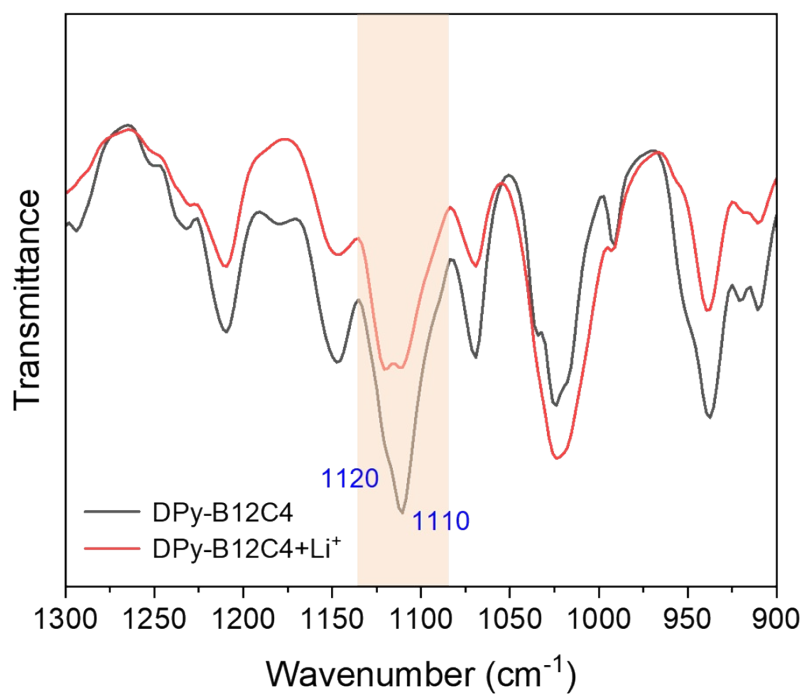

**Fig. S10.** FTIR spectra of free DPy-B12C4 ligand before and after Li<sup>+</sup> adsorption.

**Solution  $^1\text{H}$  and  $^{13}\text{C}$  NMR spectra of DPy-B12C4.**

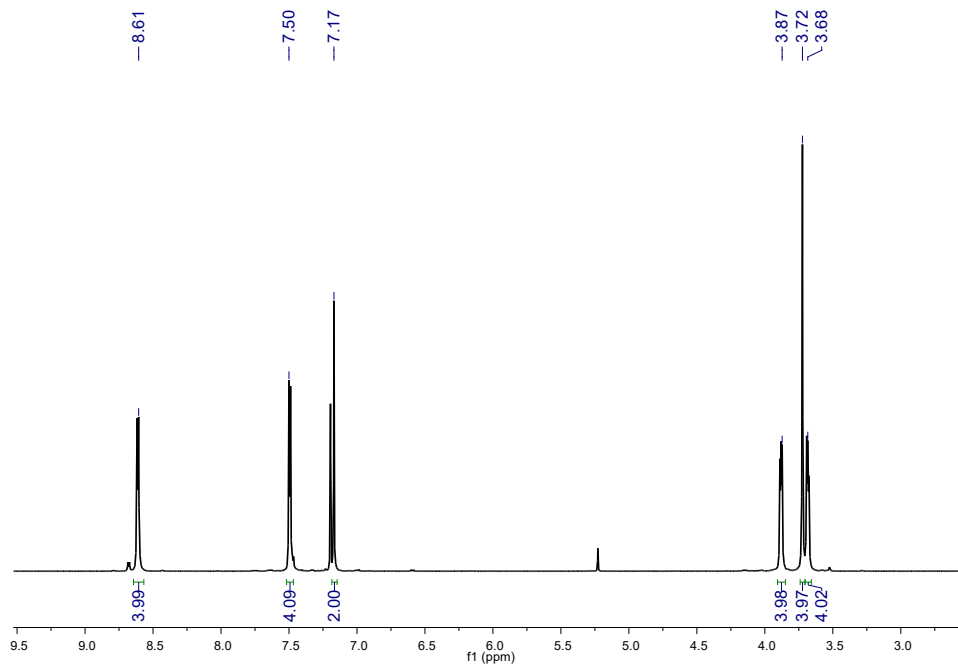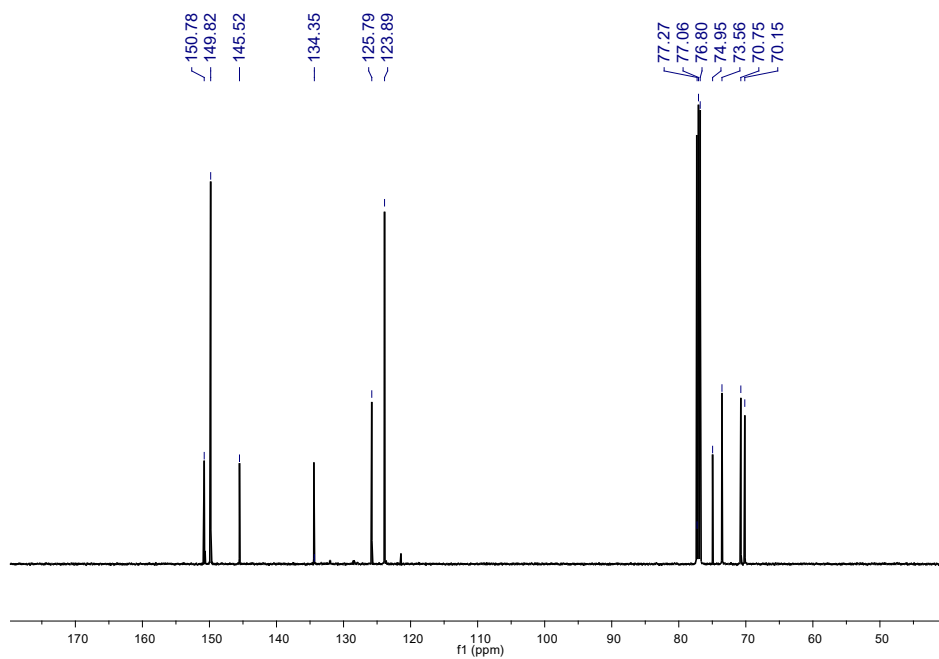

## References

- (1) Frisch, M. J.; Trucks, G. W.; Schlegel, H. B.; Scuseria, G. E.; Robb, M. A.; Cheeseman, J. R.; Scalmani, G.; Barone, V.; Petersson, G. A.; Nakatsuji, H.; Li, X.; Caricato, M.; Marenich, A. V.; Bloino, J.; Janesko, B. G.; Gomperts, R.; Mennucci, B.; Hratchian, H. P.; Ortiz, J. V.; Izmaylov, A. F.; Sonnenberg, J. L.; Williams-Young, D.; Ding, F.; Lipparini, F.; Egidi, F.; Goings, J.; Peng, B.; Petrone, A.; Henderson, T.; Ranasinghe, D.; Zakrzewski, V. G.; Gao, J.; Rega, N.; Zheng, G.; Liang, W.; Hada, M.; Ehara, M.; Toyota, K.; Fukuda, R.; Hasegawa, J.; Ishida, M.; Nakajima, T.; Honda, Y.; Kitao, O.; Nakai, H.; Vreven, T.; Throssell, K.; Montgomery, J. A., Jr.; Peralta, J. E.; Ogliaro, F.; Bearpark, M. J.; Heyd, J. J.; Brothers, E. N.; Kudin, K. N.; Staroverov, V. N.; Keith, T. A.; Kobayashi, R.; Normand, J.; Raghavachari, K.; Rendell, A. P.; Burant, J. C.; Iyengar, S. S.; Tomasi, J.; Cossi, M.; Millam, J. M.; Klene, M.; Adamo, C.; Cammi, R.; Ochterski, J. W.; Martin, R. L.; Morokuma, K.; Farkas, O.; Foresman, J. B.; Fox, D. J. Gaussian, Inc., Wallingford CT, **2016**.
- (2) Shen, J.-C., Jiang, W.-L., Guo, W.-D., Qi, Q.-Y., Ma, D.-L., Lou, X.-B., Shen, M., Hu, B.-W., Yang, H.-B., Zhao, X. A rings-in-pores net: crown ether-based covalent organic frameworks for phase-transfer catalysis. *Chem. Commun.*, **2020**, *56*, 595-598.
- (3) Sheldrick, G. M. Crystal structure refinement with SHELXL. *Acta Crystallogr. Sect. C* **2015**, *71*, 3–8.
- (4) Dolomanov, O. V.; Bourhis, L. J.; Gildea, R. J.; Howard, J. A. K.; Puschmann, H. OLEX2: A complete structure solution, refinement and analysis program. *J. Appl. Crystallogr.* **2009**, *42*, 339–341.
